# Supplementary material
Source: Research Square preprint supplement (doi:10.21203/rs.3.rs-10232761/v1)
Supplement: Supplementary file 1 [file a8a0ea0e8a66d30903402200.docx]

Appendix (I) Data collection tool for Nurse Educators; Semi structured interview guide

Title: Acquisition of clinical reasoning skills by undergraduate nursing student in Malawi: towards developing a middle range theory

Part1: Biography Particulars of the participant

1. . How old are you -------------------? 2. What is your Sex ----------------------- ? 3. What are your highest Qualifications ---------------------------------------- ?

4. How long have you been Working ----------------------------------- ? Part 2 Questions on teaching strategies that promote clinical reasoning acquisition.

5. As a nurse educator at this university what is your classroom teaching experience Probes: the teaching methods/ approaches used Promotion of clinical reasoning

6. What teaching strategies do you prefer when teaching students in class? Probes: lecture, 164 interactive, simulation, discussion, concept map problem based learning. case study, reflection,

7. What makes you choose the particular strategies? Probes: student numbers Promoting critical and reasoning

8. How do you promote clinical reasoning in your teaching?

9. What challenges do you experience with teaching students’ nurses?

10. What suggestions do you have on promotion of clinical reasoning skills for the students?

Thank you
